# Supplementary material for: Analysis of Usage Data from a Self-Guided App-Based Virtual Reality Cognitive Behavior Therapy for Acrophobia: A Randomized Controlled Trial
Source: MDPI journal article supplement (doi:10.3390/jcm9061614), 2020-05-26
Supplement: s1 [file s1]

## Supplementary file 2

Variation in practicing duration for users who experienced at least one VR session

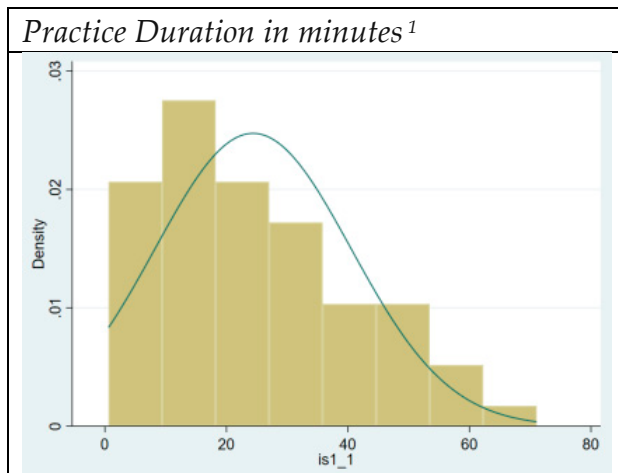

<sup>1</sup>The plot shows that the distribution is skewed to the right, but smooth and continuous. A formal test for detecting outliers relies on the normality assumption. Notwithstanding this caveat, Grubbs' test confirms the apparent absence of outliers
